# Supplementary material
Source: ML conference proceedings conference paper supplement (https://openaccess.thecvf.com/content/ICCV_2019/html/Khan_Towards_Photorealistic_Reconstruction_ICCV_2019_paper.html)
Supplement: Supplementary file 2 [file Khan_Towards_Photorealistic_Reconstruction_ICCV_2019_supplemental.zip]

Archive with 3 entries (2 files):
- 5952-supp/
- 5952-supp/directFace.avi
- 5952-supp/suppl.pdf
